# Supplementary material
Source: publisher figshare collection journal article supplement (https://sage.figshare.com/ndownloader/files/20066282)
Supplement: Supplementary file 1 [file 20066282]

**Supplementary Figure 1.** Patient cohort selection process

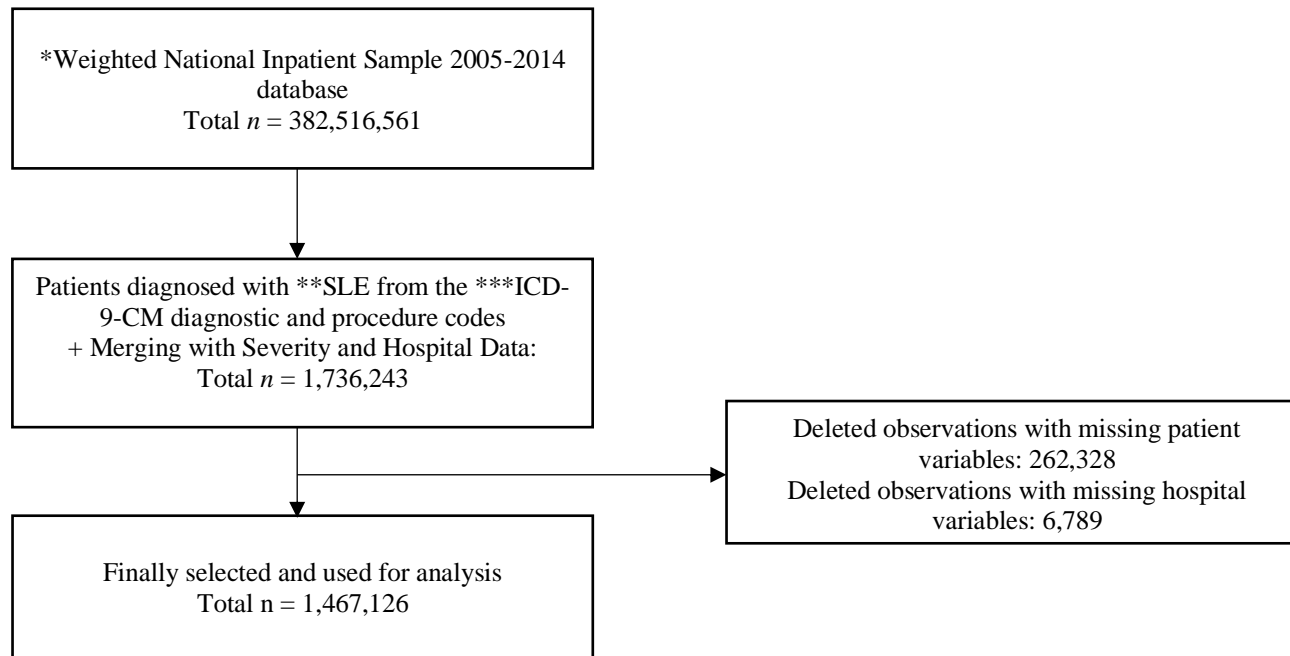

Notes: \*Weighted indicates that survey weights and adjustments to estimate national population estimates; \*\*SLE, Systemic lupus erythematosus; \*\*\*ICD-9-CM, International Classification of Diagnosis, ninth revision, Clinical Modification
